# Core deficits and quality of survival after childhood medulloblastoma: a review

Mathilde Chevignard, Hugo Câmara-Costa, François Doz, and Georges Dellatolas

*Rehabilitation Department for children with acquired neurological injury, Saint Maurice Hospitals, Saint Maurice, France (M.C.); Sorbonne Universités, UPMC University Paris 06, CNRS UMR 7371, INSERM UMR S 1146, Laboratoire d'Imagerie Biomédicale (LIB), F-75005, Paris, France (M.C.); Groupe de Recherche Clinique Handicap Cognitif et Réadaptation; UPMC Paris 6, Paris, France (M.C.); Université Paris-Saclay, Université Paris-Sud, UVSQ, CESP, INSERM, Villejuif, France.(H.C.-C, G.D.); Institut Curie and University Paris Descartes, Sorbonne Paris Cité, France (F.D.)*

**Corresponding author:** Dr Mathilde Chevignard, Rehabilitation department for children with acquired neurological injury, Saint Maurice Hospitals, 14 rue du Val d'Osne. 94410 Saint Maurice, France ([m.chevignard@hopitaux-st-maurice.fr](mailto:m.chevignard@hopitaux-st-maurice.fr)).

## Abstract

**Background.** Medulloblastoma is the most common malignant central nervous system tumor in children. Treatment most often includes surgical resection, craniospinal irradiation, and adjuvant chemotherapy. Although survival has improved dramatically, the tumor and its treatments have devastating long-term side effects that negatively impact quality of survival (QoS). The objective was to review the literature on QoS following childhood medulloblastoma.

**Methods.** This narrative review is based on a Medline database search and examination of the reference lists of papers selected.

**Results.** Frequent problems after medulloblastoma treatment include medical complications, such as long-term neurological and sensory (hearing loss) impairments; endocrine deficits, including growth problems; and secondary tumors. Neurocognitive impairment is repeatedly reported, with decreasing cognitive performances over time. Although all cognitive domains may be affected, low processing speed, attention difficulties, and working memory difficulties are described as the core cognitive deficits resulting from both cerebellar damage and the negative effect of radiation on white matter development. Long-term psychosocial limitations include low academic achievement, unemployment, and poor community integration with social isolation. Important negative prognostic factors include young age at diagnosis, conventional craniospinal radiotherapy, presence of postoperative cerebellar mutism, and perioperative complications. The influence of environmental factors, such as family background and interventions, remains understudied.

**Conclusion.** Future studies should focus on the respective impact of radiation, cerebellar damage, genomic and molecular subgroup parameters, and environmental factors on cognitive and psychosocial outcomes. Long-term (probably lifelong) follow-up into adulthood is required in order to monitor development and implement timely, suitable, multi-disciplinary rehabilitation interventions and special education or support when necessary.

## Key words

medulloblastoma | neurocognitive deficit | psychosocial outcome | quality of survival | quality of life

There is a growing number of childhood cancer survivors<sup>1</sup> and it is becoming increasingly important to improve our knowledge of the long-term adverse effects of disease and treatments in order to provide appropriate health care and decrease the risk of adverse psychosocial effects.<sup>2</sup> It has been estimated that 62.3% of pediatric cancer survivors

have at least one chronic or late-occurring condition, with 27.5% presenting a severe or life-threatening condition.<sup>3,4</sup> However, self-reported or proxy-reported quality of life among adolescent and adult survivors of childhood cancers is often little-related to the degree of disability and may overall be good.<sup>5</sup>

Among these survivors, children treated for central nervous system (CNS) malignancies in particular are at high risk for neurocognitive impairment, medical complications, and poor social outcome.<sup>6,7</sup> For instance, lower-than-expected educational attainment and increased utilization of special education services have been repeatedly reported in cases of CNS neoplasm and/or cranial radiation therapy.<sup>8–12</sup>

## Incidence of CNS Tumors and Medulloblastoma

The overall age-standardized incidence rate of childhood CNS tumors in Europe has been reported to be 29.9 per million, the most frequent types being astrocytoma and medulloblastoma.<sup>13</sup> Medulloblastoma, the most common malignant brain tumor in children, is an embryonic tumor of the cerebellum or fourth ventricle accounting for 12% to 20% of childhood CNS tumors, with median age of diagnosis 5 to 7 years and a slight male preponderance.<sup>14</sup> Medulloblastoma is rare in the adult population,<sup>15</sup> although it accounts for a meaningful percentage of all cases over the age of 18 years.

## Pathophysiology of Medulloblastoma

The main pathological categories of medulloblastoma are: classic, nodular desmoplastic, or large cell/anaplastic. Four molecular subgroups have been described (WNT pathway activation, SHH pathway activation, group 3, and group 4) and other molecular criteria are also used (MYC and MYC-N amplification, P53 mutation).<sup>16–18</sup>

*Low-risk* medulloblastoma in older children (above 3 to 5 years) is defined by localized, completely or near-completely resected tumors, classic histology, and WNT pathway activation. *Standard risk* medulloblastoma in the same age group has the same staging characteristics, but does not show the low-risk WNT pathway activation or the high-risk biopathological risk factors (such as large cell/anaplastic histology, MYC amplification, MYC-N amplification, or P53 mutation, the last two criteria often being combined with SHH pathway activation). All other cases are defined as *high-risk* medulloblastoma either on staging (residual or metastatic disease) or on high-risk biopathological criteria.

In children younger than 3 to 5 years, the low-risk category is defined by nodular desmoplastic histology or medulloblastoma with extensive nodularity, always combined with SHH pathway activation. The prognostic value of medulloblastoma with SHH pathway activation and classic histology in this age group is as yet less clear. All the other types are high-risk medulloblastoma at this age, some of them being very high risk, such as metastatic, group 3, MYC-amplified medulloblastoma.<sup>19</sup>

## Treatment of Medulloblastoma

Standard treatment includes surgery, radiotherapy, and chemotherapy, which vary according to age at diagnosis, stage, and biopathological risk factors. Surgery aims to perform the maximum tumor resection with the fewest possible neurological sequelae, and to treat obstructive hydrocephalus if present. When hydrocephalus needs to be treated before surgery, ventriculostomy is

now increasingly used rather than a ventriculo-peritoneal shunt, which carries its own morbidity. Minimum residual disease after surgery with good clinical status is preferable to complete tumor removal with impaired postoperative status, such as posterior fossa syndrome.<sup>20</sup> Radiotherapy of the entire craniospinal axis, with an additional local boost (today to the tumor bed rather than the entire posterior fossa<sup>21,22</sup>), is still part of the standard adjuvant treatment, certainly in all children older than 5 years. In younger children, radiotherapy is used depending on risk level (no radiotherapy for low-risk, focal radiotherapy for intermediate risk, or dose-adapted craniospinal radiotherapy for high-risk categories).

Chemotherapy is most often used in patients with medulloblastoma at a conventional dose. It can be the only nonsurgical treatment in young children with low-risk medulloblastoma. High-dose chemotherapy with autologous hematopoietic stem cell support can be used in patients with high-risk medulloblastoma, including young children, in order to avoid or limit the use of radiotherapy.<sup>23,24</sup> Overall survival (OS) and event-free survival (EFS) have improved dramatically over the past 30 years.<sup>13</sup> In recent studies, reported 5-year OS in standard-risk medulloblastoma was 86% to 87% and 5-year EFS was 76% to 81%.<sup>25–28</sup> Similar high OS and EFS rates are also observed in young children with low-risk medulloblastoma. However, OS is lower in children in the other risk categories<sup>23,29,30</sup> and probably different from one country to another.<sup>31,32</sup>

## Quality of Survival Following Childhood Medulloblastoma

The tumor itself and its treatments may have devastating long-term side effects, with late-onset toxicities negatively impacting a number of domains, which in turn affect quality of survival (QoS) and persist into adulthood.<sup>33–35</sup> QoS is a useful term intended to integrate overall outcomes, including medical complications, cognitive deficits, psychosocial impairments in different domains (eg, academic achievement, independence, professional and social integration, activity limitations, or participation restrictions), and self-reported and/or proxy-reported quality of life.<sup>36–41</sup>

## Aim of This Literature Review

This review aims to summarize the medical, neurocognitive, psychosocial, and quality-of-life outcomes after childhood medulloblastoma, and the risk factors (or predictors) for poor QoS. A better understanding of the determinants of QoS after childhood medulloblastoma is required in order to propose specific interventions aiming to improve QoS.

## Methods

This work consists of a narrative review, rather than a systematic review. In order to retrieve the most relevant papers, the Medline database was searched from 1990 up

to April 2016. Several combinations of the following key words were used: child, childhood, cancer, brain tumor (for more general effects and outcomes) and then posterior fossa tumors and finally medulloblastoma, and these were each combined alternately with:

- outcome, long-term, quality of survival, medical, audition, endocrine, neurological, cerebellar mutism, posterior fossa syndrome, late effects
- outcome, long-term, cognitive, neuropsychological, intellectual ability, intellectual quotient, attention, working memory, memory, executive functions,
- outcome, long-term, adaptive functioning, psychosocial function, emotion, social cognition, behavior, quality of life, health-related quality of life, academic, school, independence, autonomy.

The reference lists of the papers selected were searched in order to include papers that might have been omitted. Papers were included if they reported meaningful information regarding outcome following childhood medulloblastoma in any of the domains selected (see Table 1 for a summary of the investigations of QoS in children treated for medulloblastoma). Previous literature reviews on similar topics were analyzed, but not systematically included. Finally, papers focusing on the role of the cerebellum in cognition, learning and behavior were included for the discussion.

## Medical Outcomes

Overall, health status is poor and disability levels are considerable in adulthood following childhood medulloblastoma. Survivors of medulloblastoma are among those who suffer the most severe, clinically significant disabilities, with complaints and difficulties in a vast majority of patients several years postdiagnosis. Specifically, the tumor and its treatment may cause neurological and endocrine deficits, hearing loss, occurrence of secondary tumors, and other chronic conditions.<sup>33–35</sup>

### Neurological and Motor Deficits

Persistent, long-term, disabling neurological deficits are present in a large proportion of patients following treatment for medulloblastoma. These include ataxia/ balance abnormalities and coordination disorders, fine motor function impairment and writing difficulties, cranial nerve palsies with oculomotor dysfunctions, possible facial nerve paralysis, and, less frequently, epilepsy, motor deficit (hemiparesis), or involuntary movements.<sup>35,42–47</sup> Fine motor functioning/manual dexterity, often assessed using tapping or pegboard tasks, are consistently impaired and significantly associated not only with ataxia, but also with intellectual ability and cognitive function.<sup>46,48–50</sup> In children treated for medulloblastoma, kinematic analysis of drawing and writing showed significant impairments in automation and speed.<sup>43</sup> These difficulties often require rehabilitation and remedial teaching, with referral to

special education services or at least specific adaptations in the classroom.

### Hearing Loss (Ototoxicity)

Hearing loss can be linked to the anatomical location of the tumor, although the main causes of ototoxicity are cisplatin chemotherapy and radiotherapy.<sup>51–56</sup> Ototoxicity increases with the combination of the 2 treatments, as radiation therapy potentiates cisplatin-induced ototoxicity when delivered concomitantly.<sup>53,54</sup> Hearing loss can have a profound impact on a child's quality of life, affecting not only communication skills, but also social and cognitive development.<sup>57,58</sup> Auditory deficits are associated with a higher degree of neurocognitive complaints in adult survivors of childhood CNS tumors.<sup>59</sup> This side effect can be partially reduced by changing the radiation therapy field from the entire posterior fossa to the tumor bed, by the use of intensity-modulated radiation therapy, and, more recently, by proton beam therapy, which enables radiation to be delivered to the target tissue while to some extent sparing the surrounding tissues.<sup>55,56,60,61</sup>

### Endocrine Issues<sup>33–35,56,62–65</sup>

Growth deficit is caused by growth hormone deficiency, as well as by craniospinal-irradiation-induced spine shortening, especially in patients treated before the age of 3 years. Indeed, craniospinal radiotherapy affects the growth of the axial skeleton, leading to shorter standing and sitting height, with normal growth of the upper and lower extremities. In addition, chemotherapy could potentiate the deleterious effects of radiation on growth. Endocrine deficits, which occur in more than half of patients several years post-treatment, are most often centered on the hypothalamo-pituitary tract and may include growth hormone deficiency, early or delayed puberty onset, hypogonadism, reduced fertility, hypothyroidism, obesity, and, more rarely, cortisol deficiency. In a report on patients treated in infancy, 100% of the survivors displayed growth abnormalities requiring hormone replacement therapy.<sup>29</sup> Direct irradiation of thyroid or ovary radiation during craniospinal radiation could cause a combination of central and peripheral hormonal deficiency. Timely and ideally pre-symptomatic hormone replacement therapy could prevent health-related consequences of disturbed growth, as well as thyroid and gonadal deficits. Lifelong follow-up and hormone replacement should be organized whenever necessary.

### Secondary Tumors

Some patients with medulloblastoma go on to develop secondary tumors, most often meningiomas and high-grade gliomas, which can be induced by radiotherapy.<sup>34,66</sup> Venous malformations (cavernomas) may also appear following radiation. The 10-year incidence rate of secondary malignancies has been estimated at 4.2%, and many were

**Table 1** Summary of investigations of QoS in children treated for MB

| Ref.           | Author, year                    | Population (n)                                                 | Follow-up                         | Main findings                                                                                                                                                                                                                                                                                |
|----------------|---------------------------------|----------------------------------------------------------------|-----------------------------------|----------------------------------------------------------------------------------------------------------------------------------------------------------------------------------------------------------------------------------------------------------------------------------------------|
| <sup>6</sup>   | Armstrong et al., 2009          | Adult survivors of childhood CNS malignancies (2821); MB (395) | ≥10 years                         | RT increased the risk of subsequent CNS neoplasms, neurocognitive impairment, and unemployment.                                                                                                                                                                                              |
| <sup>42</sup>  | Benesch et al., 2009            | MB (18); ependymoma (5)                                        | Md = 56 months                    | Neurological late effects correlated with poorer QoL in younger patients. No significant correlation between neurocognitive performance and QoL.                                                                                                                                             |
| <sup>38</sup>  | Bhat et al., 2005               | BT (134); MB (32)                                              | M = 4.26 years                    | RT associated with lower total scores of HRQoL (PedsQL) and psychosocial, emotional, and social functioning.                                                                                                                                                                                 |
| <sup>108</sup> | Bonner et al., 2008             | BT (51); MB (12)                                               | M = 6.1 years                     | Deficits in social functioning related to errors in facial expression recognition.                                                                                                                                                                                                           |
| <sup>40</sup>  | Brinkman et al., 2012           | embryonal BT (220); MB (174)                                   | M = 3.6 years                     | Parent-report: largely positive social adjustment; PFS and high-risk treatment status associated with social problems.                                                                                                                                                                       |
| <sup>75</sup>  | Brinkman et al., 2012           | MB (20)                                                        | ≥10 years                         | Reduced white matter integrity associated with poorer performance on tasks of executive function.                                                                                                                                                                                            |
| <sup>116</sup> | Bull et al., 2014               | MB (37), astrocytoma (35); controls (38)                       | 3 years                           | Cognitive and emotional disturbances, as well as older age at enrollment predicted lower HRQoL.                                                                                                                                                                                              |
| <sup>115</sup> | Bull et al., 2015               | MB (37), astrocytoma (35); controls (38)                       | 3 years                           | Some association of QoS measured through questionnaires with FSIQ in the whole sample.                                                                                                                                                                                                       |
| <sup>46</sup>  | Callu et al., 2009              | CT (39): malignant (20) and benign (19)                        | ≥ 6 months after end of treatment | Cerebellar signs and impaired manual skills (Purdue Pegboard) were strongly associated with cognitive difficulties and lesion of the dentate nuclei.                                                                                                                                         |
| <sup>67</sup>  | Cassidy et al., 2000            | MB (24)                                                        | 6 months to 7 years               | Ocular sequelae: 50%; required ophthalmic intervention: 41%.                                                                                                                                                                                                                                 |
| <sup>105</sup> | Catsman-Berrevoets et al., 2010 | PFS (41) after resection of CT (CMS)                           | Until recurrence of speech        | During recovery all children were dysarthric. Association of duration of mutism with severity of neurological symptoms.                                                                                                                                                                      |
| <sup>118</sup> | Copeland et al., 1999           | CT (27), dg ≤ 36 months; MB (15)                               | 1 to 13 years                     | IQ decline in children who received cranial RT.                                                                                                                                                                                                                                              |
| <sup>50</sup>  | Davis et al., 2010              | CT (15); MB(5); controls (242)                                 | 5 to 126 months                   | Correlation between cognitive and motor skills in both groups.                                                                                                                                                                                                                               |
| <sup>92</sup>  | De Smet et al., 2007            | Review of 283 cases of CMS                                     | Review                            | Almost all children (98.8%) displayed motor speech deficits after the mute period.                                                                                                                                                                                                           |
| <sup>137</sup> | De Smet et al., 2012            | CT (24); with CMS (12)                                         | 1 to 12 years after tumor         | Speech analysis revealed more severe deficits in patients with CMS.                                                                                                                                                                                                                          |
| <sup>34</sup>  | Edelstein et al., 2011          | MB (20)                                                        | Md = 15.5 years                   | Endocrine deficiencies most common and 60% hypothyroid. Secondary tumors: 25%. Diabetes, hypertension and chronic conditions interpreted as signs of early aging. Scores below average across multiple neurocognitive domains. Younger age at diagnosis was associated with lower IQ scores. |
| <sup>59</sup>  | Ellenberg et al., 2009          | Pediatric survivors of CNS tumors (802); MB (172)              | ≥ 16 years                        | Auditory deficits, radiation and female gender were associated with a higher degree of questionnaire-reported neurocognitive complaints.                                                                                                                                                     |
| <sup>33</sup>  | Frange et al., 2009             | MB (45)                                                        | Md = 14.4 years                   | Self-reported (HUI) endocrine complications: 52%; neurological deficits: 79%. Impairments in psychosocial functioning included: employment, driving capacity, independent living, and marital status in most patients.                                                                       |
| <sup>133</sup> | Gelabert-González et al., 2001  | Review of 134 cases of CMS; MB (85)                            | Review                            | Lesion of the vermis in 94% of the cases.                                                                                                                                                                                                                                                    |

**Table 1** Continued

| Ref.           | Author, year                | Population (n)                                       | Follow-up               | Main findings                                                                                                                                                                                |
|----------------|-----------------------------|------------------------------------------------------|-------------------------|----------------------------------------------------------------------------------------------------------------------------------------------------------------------------------------------|
| <sup>22</sup>  | Grill et al., 1999          | PF tumors (31); MB (19)                              | ≥1 year                 | High craniospinal irradiation dose associated with lower FSIQ and lower verbal comprehension scores.                                                                                         |
| <sup>48</sup>  | Grill et al., 2004          | Malignant PF tumors (76); MB (52)                    | M = 5.2 years           | Fine motor deficits (Purdue Pegboard) and preoperative hydrocephalus associated with low verbal IQ.                                                                                          |
| <sup>123</sup> | Gupta et al., 2012          | MB (20)                                              | 2 years                 | Preserved cognitive function with HFRT.                                                                                                                                                      |
| <sup>138</sup> | Hardy et al., 2008          | MB (35)                                              | 2 years                 | Lower IQ and academic skills in survivors with shunted hydrocephalus.                                                                                                                        |
| <sup>62</sup>  | Heikens et al., 1998        | MB (20)                                              | Md = 16 years           | Endocrine abnormalities: 75%; impaired growth hormone secretion: 70%.                                                                                                                        |
| <sup>110</sup> | Henrich et al., 2014        | Parents (16) and care providers (16) of MB survivors | M = 10 years            | Semi-structured interview: parents considered social functioning as the most important factor, while providers thought that parents cared most about their children's cognitive functioning. |
| <sup>98</sup>  | Hoppe-Hirsch et al., 1995   | MB (59) and ependymoma (37) with RT only in PF       | 10 years                | Progressive IQ decline in the MB group at 5-year and 10-year follow-up.                                                                                                                      |
| <sup>106</sup> | Hopyan et al., 2010         | CT (37); MB (18)                                     | M = 63.7 months         | CT disrupted emotional regulation through cognition control.                                                                                                                                 |
| <sup>55</sup>  | Huang et al., 2002          | MB (26)                                              | Md = 18 to 51 months    | Intensity-modulated radiation therapy, compared to conventional RT (CSR followed by posterior fossa boost), reduced cisplatin ototoxicity.                                                   |
| <sup>104</sup> | Huber et al., 2007          | PF tumors (54); MB (29)                              | M = 13.4 years          | Ataxic dysarthric speech in irradiated MB survivors. Disfluent and slow speech, regardless of tumor type and irradiation history.                                                            |
| <sup>36</sup>  | Johnson et al., 1994        | MB (32)                                              | ≥5 years                | Lower IQ for patients diagnosed before the age of 3 years.                                                                                                                                   |
| <sup>140</sup> | Kao et al., 1994            | MB/PNET (28)                                         | Pre- and post-treatment | Adverse perioperative medical events associated with neurocognitive deterioration                                                                                                            |
| <sup>37</sup>  | Kennedy et al., 2014        | MB (151)                                             | Md = 5.8 years          | HFRT associated with better reports of executive function (BRIEF) and poorer growth compared with STRT. Hair abnormalities: 80%.                                                             |
| <sup>120</sup> | Kieffer-Renaux et al., 2000 | MB (36)                                              | M = 4.3 years           | Supratentorial radiation dose associated with impaired intellectual outcome.                                                                                                                 |
| <sup>97</sup>  | Kieffer-Renaux et al., 2005 | PF tumors (40); MB (31)                              | M = 6.7 years           | Decline of FSIQ over time, except in case of posterior fossa RT alone (n=7).                                                                                                                 |
| <sup>41</sup>  | Kiltie et al., 1997         | Young MB, dg < 36 months (37)                        | ≥10 years               | Stable employment maintenance was rare (n=1) and no young adult was married.                                                                                                                 |
| <sup>114</sup> | Kuhlthau et al., 2012       | BT (142); MB (50) treated with proton RT             | 3 years                 | Poor parent-reported HRQoL in children with MB. HRQoL negatively correlated with CSR and chemotherapy and positively associated with FSIQ.                                                   |
| <sup>112</sup> | Kulkarni et al., 2013       | PF (62); MB (19)                                     | M = 5.2 years           | QoL similar to the general population. Decreased QoL associated with: hydrocephalus, ventricular size, poor family functioning, and family income.                                           |
| <sup>122</sup> | Lafay-Cousin et al., 2009   | MB, <3 years of age or less (29)                     | ≥5 years                | Low IQ and academic performances associated with conventional RT, but not with reduced RT.                                                                                                   |
| <sup>52</sup>  | Lafay-Cousin et al., 2013   | MB (35)                                              | Md = 67 months          | Cisplatin ototoxicity requiring hearing aid in 25.7% of patients.                                                                                                                            |
| <sup>63</sup>  | Laughton et al., 2008       | Embryonal BT (88); MB (75)                           | 4 years                 | Growth hormone deficiency: 93%, thyroid-stimulation deficiency: 23%, adrenocorticotrophic deficiency: 38%, and primary hypothyroidism: 65%.                                                  |



**Table 1** Continued

| Ref.           | Author, year            | Population (n)                                        | Follow-up                                | Main findings                                                                                                                                                                                                                                                   |
|----------------|-------------------------|-------------------------------------------------------|------------------------------------------|-----------------------------------------------------------------------------------------------------------------------------------------------------------------------------------------------------------------------------------------------------------------|
| <sup>136</sup> | Law et al., 2012        | PF tumors (51); MB and CMS (38)                       | M = 3.5 years                            | CMS associated with left-handedness, MB histology and damage within the cerebello-thalamo-cerebral pathway in the right cerebellum.                                                                                                                             |
| <sup>90</sup>  | Law et al., 2015        | MB (24); controls (20)                                | M = 6.28 years                           | Compromised cerebrocerebellar connections associated with deficits in working memory.                                                                                                                                                                           |
| <sup>78</sup>  | Levisohn et al., 2000   | CT (19); MB (11)                                      | Testing prior to radiation (if required) | "Cerebellar cognitive affective syndrome": impairments in executive and visuospatial functions, expressive language, verbal memory and affect modulation.                                                                                                       |
| <sup>64</sup>  | Livesey et al., 1990    | BT (144); MB (60)                                     | Md = 9.6 years                           | Growth hormone deficiency: 97%. Effect of spinal irradiation on spinal growth.                                                                                                                                                                                  |
| <sup>124</sup> | Mabbott et al., 2005    | PF tumors (53); MB (46)                               | Md = 4.84 years                          | Decline in academic abilities. Hydrocephalus associated with poorer academic achievement. Neither psychological distress nor behavior problems were significant.                                                                                                |
| <sup>74</sup>  | Mabbott et al., 2006    | MB (8)                                                | M = 2.5 years                            | Microscopic damage in white matter related to poor intellectual outcome.                                                                                                                                                                                        |
| <sup>87</sup>  | Mabbott et al., 2008    | PF tumors (64); cranial radiation in majority MB (32) | M = 4.59 years                           | Sustained attention and working memory largely intact. Slow processing speed and low IQ associated with cranial RT and post-surgical complications.                                                                                                             |
| <sup>89</sup>  | Mabbott et al., 2009    | PF tumors (39); MB (11) and non-CNS tumors (15)       | M = 4.98 years                           | Deficits in selective attention in all patients with PF tumors.                                                                                                                                                                                                 |
| <sup>100</sup> | Maddrey et al., 2005    | MB (16)                                               | M = 15 years                             | Significant impairments in more than 50% of survivors in attention, memory, visuospatial abilities, motor function, language, and executive functioning. Impairments in all psychosocial domains. Self-reported and caregiver-reported QoL in the normal range. |
| <sup>135</sup> | Miller et al., 2010     | CT (22); PFS (11)                                     | 3 to 4 weeks                             | PFS associated with bilateral damage to the proximal efferent cerebellar pathway.                                                                                                                                                                               |
| <sup>60</sup>  | Moeller et al., 2011    | MB receiving proton therapy (23)                      | 1 year                                   | Lower ototoxicity associated with the use of proton therapy.                                                                                                                                                                                                    |
| <sup>95</sup>  | Moxon-Emre et al., 2014 | MB (113)                                              | M = 6.06 years                           | No intellectual declines associated with reduced-dose CSR plus TB boost. Poorer intellectual outcomes associated with complications, hydrocephalus, and CMS.                                                                                                    |
| <sup>94</sup>  | Mulhern et al., 1998    | MB (22)                                               | 6.1 to 9.9 years                         | IQ lower in younger children at diagnosis (less than 8.45 years) who were treated with standard-dose cranial RT, compared with reduced-dose cranial RT.                                                                                                         |
| <sup>72</sup>  | Mulhern et al., 1999    | MB (18); low-grade PF tumors (18)                     | ≥1 year                                  | Low FSIQ associated with reduced volume of normal white matter.                                                                                                                                                                                                 |
| <sup>73</sup>  | Mulhern et al., 2001    | Pediatric MB (42)                                     | ≥1 year                                  | Worse neurocognitive outcome associated with young age at CSR, longer time since completion of treatment and white matter loss.                                                                                                                                 |
| <sup>119</sup> | Mulhern et al., 2005    | MB (111)                                              | Md = 3.14 years                          | Significant decline in mean IQ and academic skills. Higher rates of decline in high-risk patients younger at diagnosis (<7 years).                                                                                                                              |
| <sup>71</sup>  | Odame et al., 2006      | PF tumors (25); MB (7)                                | ≥ 1 year                                 | Osteoporosis in more than 40% of patients who received RT.                                                                                                                                                                                                      |
| <sup>65</sup>  | Olshan et al., 1992     | MB (38)                                               | 4 years                                  | Chemotherapy potentiates the deleterious effects of RT on growth.                                                                                                                                                                                               |
| <sup>58</sup>  | Orgel et al., 2016      | BT with platinum therapy (58); MB (39)                | M = 4.6 years                            | Hearing loss in 55% of patients associated with deficits in intelligence, executive function, and verbal reasoning.                                                                                                                                             |

**Table 1** Continued

| Ref.           | Author, year             | Population (n)                                           | Follow-up                                       | Main findings                                                                                                                                                                                                                                   |
|----------------|--------------------------|----------------------------------------------------------|-------------------------------------------------|-------------------------------------------------------------------------------------------------------------------------------------------------------------------------------------------------------------------------------------------------|
| <sup>134</sup> | Ozimek et al., 2004      | CT (14); MB (3)                                          | Postoperative period                            | Association of CMS with lesion to the deep cerebellar nuclei                                                                                                                                                                                    |
| <sup>26</sup>  | Packer et al., 2013      | MB (379)                                                 | Md = 9.7 years                                  | Estimated cumulative 10-year incidence rate of secondary malignancies = 4.2%.                                                                                                                                                                   |
| <sup>99</sup>  | Palmer et al., 2001      | MB (44)                                                  | M = 5.24 years                                  | Decline on FSIQ (2.55 points/yr) but increased raw scores (not age-adjusted).                                                                                                                                                                   |
| <sup>93</sup>  | Palmer et al., 2003      | MB (50)                                                  | 7 years                                         | CSR (35–40 Gy) associated with IQ decline of about 2 points/yr.                                                                                                                                                                                 |
| <sup>132</sup> | Palmer et al., 2010      | MB (44); MB with CMS (22)                                | 1 year                                          | CMS associated with lower processing speed, attention, working memory, cognitive efficiency, and academic skills.                                                                                                                               |
| <sup>86</sup>  | Palmer et al., 2013      | MB (126)                                                 | 5 years                                         | Associations: Poor processing speed with younger age at diagnosis and high-risk; poor working memory and poor broad attention with high-risk; parental education and marital status with baseline scores of working memory and broad attention. |
| <sup>54</sup>  | Paulino et al., 2010     | MB (44)                                                  | Md = 41 months                                  | Severe ototoxicity in 18.2% of children treated with intensity-modulated radiation therapy boost and cisplatin-based chemotherapy.                                                                                                              |
| <sup>44</sup>  | Piscione et al., 2014    | PF tumors (30); MB (12)                                  | M = 6.1 years                                   | Decreased functioning in balance and running speed ability.                                                                                                                                                                                     |
| <sup>49</sup>  | Puget et al., 2009       | PF tumors (61); MB (50)                                  | M = 5.6 years                                   | Neurological deficits were strong predictors of low cognitive performances and were associated with damage to the dentate nuclei or the inferior vermis.                                                                                        |
| <sup>61</sup>  | Pulsifer et al., 2015    | CNS tumor survivors treated with proton RT (60); MB (23) | M = 2.5 years                                   | Proton radiation therapy associated with decline in processing speed scores, but not with significant changes in FSIQ and other IQ components.                                                                                                  |
| <sup>76</sup>  | Reddick et al., 2003     | BT (40); MB (18)                                         | Md = 5.7 years                                  | Reduced normal-appearing white matter associated with decreased attentional abilities, leading to decline in IQ and academic achievement.                                                                                                       |
| <sup>88</sup>  | Reeves et al., 2005      | MB (38)                                                  | M = 1.97 years                                  | Attention deficits (Conners Continuous Performance Test). No deficits in Verbal IQ.                                                                                                                                                             |
| <sup>35</sup>  | Ribi et al., 2005        | MB survivors (18)                                        | M = 12.2 years                                  | Neurological complications: 72%. Endocrine deficits: 61%. Neurocognitive deficits: attention and processing speed: 79%; learning and memory: 88%; language: 56%; visual perception: 50%; executive functions: 64%.                              |
| <sup>96</sup>  | Ris et al., 2001         | MB (43)                                                  | Md = 2.5 years                                  | IQ decline steeper in younger children and females.                                                                                                                                                                                             |
| <sup>83</sup>  | Ris et al., 2013         | MB (110)                                                 | ≥5 years                                        | Decline in academic and intellectual performances; steeper decline in younger patients. CMS associated with lower IQ.                                                                                                                           |
| <sup>129</sup> | Riva et al., 2000        | CT (26); MB (11)                                         | 5 to 6 weeks after surgery (prior to radiation) | Left CT: language and auditory sequential memory deficits; right CT: visuospatial deficits; vermian lesions: postsurgical CMS or behavior disturbances.                                                                                         |
| <sup>130</sup> | Robertson et al., 2006   | MB (450)                                                 | ≥ 1 year                                        | CMS in 24% of the children, associated with brainstem invasion.                                                                                                                                                                                 |
| <sup>139</sup> | Roncadin et al., 2008    | PF tumors (58); MB (29)                                  | 5 years                                         | Poor outcome associated with adverse perioperative medical events.                                                                                                                                                                              |
| <sup>79</sup>  | Rønning et al., 2005     | PF tumors (23); MB (11)                                  | >10 years                                       | Young age at time of treatment associated with lower IQ in the MB group.                                                                                                                                                                        |
| <sup>43</sup>  | Rueckriegel et al., 2009 | MB (27) and astrocytoma (16)                             | ≥ 1 year                                        | Loss of fine motor function and ataxia associated with lower IQ.                                                                                                                                                                                |

**Table 1** Continued

| Ref. | Author, year           | Population (n)          | Follow-up        | Main findings                                                                                                          |
|------|------------------------|-------------------------|------------------|------------------------------------------------------------------------------------------------------------------------|
| 45   | Schoch et al., 2006    | CT (22); malignant (8)  | M = 7.7 years    | Balance abnormalities associated with involvement of the deep cerebellar nuclei.                                       |
| 84   | Schreiber et al., 2014 | MB (165)                | Up to 5 years    | Decline in intellectual and academic skills associated with hearing loss, PFS, and young age at diagnosis.             |
| 121  | Silber et al., 1992    | MB (24); ALL (24)       | M = 3.65 years   | Final IQ associated with initial IQ, RT dose, and age at RT.                                                           |
| 82   | Spiegler et al., 2004  | PF tumors (34); MB (30) | Up to 120 months | Declines in IQ, visual-motor integration, visual memory, verbal fluency, and executive functioning.                    |
| 47   | Ullrich et al., 2015   | MB (52)                 | M = 7.5 years    | Incidence of seizures: 7.7%.                                                                                           |
| 80   | Vaquero et al., 2008   | CT (20); MB (7)         | M = 6.5 years    | Impaired executive functioning.                                                                                        |
| 29   | Walter et al., 1999    | Young MB (29)           | ≥ 5 years        | IQ decline. Required hormone replacement therapy = 100%.                                                               |
| 131  | Wells et al., 2010     | MB (28); CMS (11)       | 1 year           | CMS associated with brainstem invasion, superior and middle cerebellar peduncle edema, and poorer functional outcomes. |
| 70   | Wolfe et al., 2012     | PF tumor (14); MB (10)  | ≥ 2 years        | Impaired cardio-respiratory fitness.                                                                                   |
| 56   | Yock, 2016             | MB proton RT (49)       | Md = 7 years     | FSIQ decline driven by decrements in processing speed and verbal comprehension.                                        |

ALL: acute lymphocytic leukemia; BRIEF: Behavior Rating Inventory of Executive Function; BT: brain tumors; CMS: cerebellar mutism syndrome; CNS: central nervous system; CSR: craniospinal radiation; CT: cerebellar tumors; Dg: diagnosis; FSIQ: Full Scale Intelligence Quotient; HFRT: hyperfractionated radiation therapy; HRQoL: health-related quality of life; HUI: Health Utilities Index; IQ: intelligence quotient; M: mean; MB: medulloblastoma; Md: median; PF: posterior fossa; PFS: posterior fossa syndrome; PNET: primitive neuroectodermal tumor; QoL: quality of life; STRT: standard radiation therapy; TB: tumor bed; RT: radiotherapy; Yr: year.

malignant gliomas.<sup>26</sup> Patients with genetic predisposition are at higher risk of a second cancer.<sup>66</sup>

## Other Medical Outcomes

Ophthalmic complications are frequent and visual loss or blindness may occur, especially in case of delayed diagnosis, as a result of prolonged, increased intracranial pressure.<sup>67–69</sup> Radiation-induced cataract may also impair vision and require surgery. According to one report, adult survivors of childhood medulloblastoma could present increased risk of chronic pathologies such as diabetes and hypertension, both of which are related to early aging.<sup>34</sup> Reduced cardio-respiratory fitness in patients treated for posterior fossa tumors has been reported, as a result of a combination of factors related to the tumor and its treatments, as well as to lower rates of physical exercise.<sup>70</sup> Osteoporosis, associated with higher levels of pain, lower levels of mobility, and reduced overall health-related quality of life (HRQoL), has also been reported in over 40% of children treated with radiation therapy for brain tumors.<sup>71</sup> Patients also often complain about persistent alopecia, which can be severe.<sup>37</sup>

## Cognitive Outcome

Patients treated for childhood medulloblastoma often present significant cognitive deficits and academic difficulties

requiring special education services.<sup>8,34,35</sup> These problems are thought to be related to the effects of radiation on subsequent white matter development<sup>72–76</sup> and to cerebellar damage.<sup>46,48,49,77–81</sup> Intellectual ability, measured through the intelligence quotient (IQ), is the most frequently studied outcome.<sup>82–85</sup> Deficits are reported in most cognitive domains, with an emphasis on attention, processing speed, and working memory.<sup>86–90</sup> Executive function deficits are frequent and are attributed to cerebello-cerebral pathway dysfunction.<sup>91</sup> Motor speech deficits were reported in almost all survivors following postoperative posterior fossa syndrome.<sup>92</sup> The association between fine motor skill impairment and signs of cerebellar dysfunction on one hand, and cognitive function on the other, was found to be significant and strong.<sup>46,48–50</sup> Many adults treated for pediatric medulloblastoma exhibit global neurocognitive impairments many years postdiagnosis, with performances falling within the clinical range in several cognitive domains.<sup>34</sup>

## Intellectual Functioning

A deleterious impact of the tumor and its treatments on IQ is commonly reported, with decline over time during at least the first 7 years.<sup>22,93–98</sup> Patients who were younger at diagnosis are at higher risk of impaired cognitive functioning.<sup>29,85,93</sup> The observed decline is frequently much steeper in children with higher IQ scores at the first assessment.<sup>93,98</sup> This decline starts in the first years following completion of treatment,<sup>93</sup> while a particularly long-term study<sup>34</sup> reported



stability of IQ scores 20 to 40 years postdiagnosis. The decrease in IQ scores has been attributed to slower acquisition of knowledge (with children acquiring knowledge at 50% to 60% the expected rate), rather than to the loss of previously learned information, as indicated by raw score instead of the usual age-adjusted score analysis.<sup>99</sup>

### Attention, Working Memory, and Processing Speed

Although deficits have been documented in a variety of cognitive functions, impairments have most often been identified in sustained attention (the ability to remain alert or focused), information processing speed, and working memory.<sup>86-91,100</sup> Processing speed is typically conceptualized as the rapidity with which one can perform relatively automatic mental tasks. Working memory, usually conceptualized as an executive function, is a temporary workspace in which information is maintained and manipulated over a short period. Faster processing speed probably places less demand on maintaining information in the working memory. These cognitive functions are important for skill and knowledge acquisition, and their dysfunction has been hypothesized to be the core deficit explaining the IQ decline and academic underachievement.<sup>85,86</sup>

### Executive Functions

Executive functions are a collection of distinct, although inter-related, abilities that are necessary for effective and appropriate behavior and for independent functioning. These include inhibition, mental flexibility, planning, decision-making, judgment, abstract reasoning, concept formation, problem-solving, and awareness. Significant deficits among patients with medulloblastoma have been reported in most of these areas, with deteriorating performances over time.<sup>81,100</sup> Metacognition and awareness difficulties have also been reported in these patients, with unrealistic perceptions of their intellectual and scholastic abilities.<sup>37</sup> Executive functions are most often assessed using paper-and-pencil tests, which do not always reflect the actual difficulties patients can experience in everyday life. Therefore, a number of more "ecological" assessments have been developed, which include tests mimicking activities of everyday life in a formal testing environment and questionnaires focusing on executive deficits that can be observed in daily situations (see,<sup>101</sup> for a review). However, the degree of impairment in executive functioning assessed by questionnaires is often low when compared with that obtained by direct neuropsychological testing, and correlations between questionnaires and performance-based measures are generally fairly poor.<sup>102,103</sup>

### Speech and Language

Cerebellar tumor survivors may present disfluent and slow speech and medulloblastoma survivors can be at risk for exhibiting ataxic dysarthric features.<sup>104</sup> Following cerebellar mutism syndrome, motor speech and language deficits

have been reported.<sup>105</sup> According to one investigation, motor speech deficits could be present in almost all (98.8%) patients who sustained this complication.<sup>92</sup>

### Other Cognitive Outcomes

Memory and learning deficits were reported in a majority of children with medulloblastoma,<sup>35</sup> as well as significant declines in visual-motor integration, visual memory, and verbal fluency, but not in verbal memory and receptive vocabulary.<sup>82</sup> Another investigation reported relative insensitivity to negative emotions and difficulties in cognitive control of emotions in patients treated for medulloblastoma.<sup>106</sup>

## Psychosocial Functioning and Quality of Life

Compared to healthy controls or to subjects with non-CNS pediatric malignancies, children treated for medulloblastoma show an increased risk for academic underachievement and need for remedial teaching,<sup>9-11,100</sup> unemployment,<sup>2,12,41,59</sup> for not being married or having children,<sup>2,33,41</sup> inability to live independently,<sup>33,100</sup> and social isolation.<sup>35,100</sup> A meta-analysis of unemployment among adult survivors of childhood cancers showed that survivors were nearly twice as likely to be unemployed than healthy controls, and 5 times more likely in case of brain tumor; the risk of unemployment increased further in case of cranial radiotherapy.<sup>12</sup> It has been repeatedly reported that, among adult survivors of childhood cancer, only those who have had CNS tumors experience significant educational deficits, especially when treatment included cranial irradiation.<sup>9-11,107</sup> Hearing loss<sup>2,59</sup> and specific neuropsychological deficits, such as impairment of facial expression recognition,<sup>108</sup> increase the risk of poor social outcome.

Studies using questionnaires assessing social adjustment among childhood brain tumor survivors, completed either by the survivor or the parents, have indicated conflicting results, although social isolation (eg, having fewer friends) is consistently reported (see<sup>39</sup> and <sup>109</sup> for reviews). A recent study using parental questionnaires concluded that parent ratings of their child's social adjustment several years after a pediatric embryonal tumor were largely positive.<sup>40</sup> Another study showed that parents of children treated for medulloblastoma considered that the most important factor in their child's quality of life was social functioning (eg, ability to make friends); conversely, health care providers thought that parents were mainly concerned about their children's cognitive functioning and academic achievement.<sup>110</sup>

Other studies found that self-reported quality of life was not related to the degree of disability.<sup>111</sup> HRQoL is a multi-dimensional concept referring specifically to the subjective view of the individual survivor about his or her life situation. It includes physical, social, cognitive, and emotional functioning dimensions and is emerging as an essential health outcome for brain tumor clinical trials.<sup>38</sup> In a study on adolescent and adult survivors of childhood cancer,

HRQoL differences between survivors and controls were small, but having had a CNS tumor was associated with lower HRQoL.<sup>5</sup> According to some studies of childhood medulloblastoma survivors, despite the frequent, severe neuropsychological and functional deficits described above, HRQoL reported by both the survivors and their caregivers was within the normal range<sup>100,112</sup> and/or was not related to psychometric measures.<sup>113</sup> However, other studies have found significantly decreased self-reported and proxy-reported HRQoL among patients with brain tumors, especially patients with medulloblastoma,<sup>38,114</sup> and some degree of relationship between psychometric measures and self-reported and proxy-reported HRQoL.<sup>115,116</sup> HRQoL tends to be relatively higher according to self-reports than to proxy (parent) reports, although the two are frequently correlated.<sup>35,114</sup>

## Factors Associated with Quality of Survival

Factors associated with overall QoS in children treated for medulloblastoma include: age at diagnosis; treatment-related factors: surgery (eg, perioperative and postsurgery medical events and complications), radiotherapy (doses and volumes), chemotherapy (eg, cisplatin-induced hearing loss); tumor-related factors (standard or high-risk, size, localization within the cerebellum, brainstem involvement, hydrocephalus, medulloblastoma subgroup, and biological markers); presence of a postoperative cerebellar mutism syndrome; presence of persistent neurological, fine motor, or sensory deficits (eg, ataxia, manual dexterity impairment, dysarthria, and oculomotor and visual deficits); factors related to child, family, and environment (gender, age, parental education level and socioeconomic status, educational environment, and rehabilitation interventions). The list of associated factors can differ according to the specific outcome considered (medical, neurocognitive, or psychosocial). For instance, neurological, sensory, endocrine, and neurocognitive deficits could be risk factors for social isolation, while motor deficits could be more strongly associated with cognitive problems. In addition, respondent's individual personality and emotional factors, as well as contextual factors (eg, respondent's understanding of the aims of the questionnaires), can influence the answers to questionnaires assessing social adjustment or quality of life.<sup>103</sup>

### Radiotherapy

Radiotherapy is probably the most widely investigated risk factor for poor QoS among children with medulloblastoma. Radiotherapy is the main risk factor for occurrence of secondary tumors<sup>6,26</sup> and cranial radiation therapy is a major factor for endocrine deficits<sup>117</sup> and hearing loss,<sup>53-55</sup> especially in young patients.<sup>53,63,117</sup> Although the idea that only children who receive cranial radiation therapy suffer neurocognitive deficits<sup>118</sup> is now questioned by evidence that the cerebellar lesion may itself play an important role (eg,<sup>49</sup>). Many studies have shown the negative impact of

cranial radiation therapy on cognition,<sup>72,73,97,98,118,119</sup> as well as an increase in neurocognitive deficits with an increase in dose.<sup>22,95,99,120-122</sup> Cognitive deficits have been associated with white matter loss<sup>72,73,75,76</sup> and with microscopic damage of normally appearing white matter after cranial radiation therapy.<sup>74</sup> Neurocognitive deficits have been mainly attributed to supratentorial irradiation and much less to posterior fossa irradiation.<sup>97,98,120</sup> However, a recent study reported stable intellectual trajectories in patients treated with reduced craniospinal irradiation plus tumor bed boost, contrasting with the intellectual declines usually observed in patients treated with reduced craniospinal irradiation plus posterior fossa boost.<sup>95</sup> Another study reported cognitive impairment even after posterior fossa irradiation alone. Cranial radiation therapy was found to be associated with poor educational outcomes,<sup>9,11,107</sup> but less systematically with reduced social adjustment or quality of life.<sup>39,40,114</sup> New therapeutic protocols, using proton beam therapy<sup>56,61,114</sup> or hyperfractionated radiation therapy,<sup>37,123</sup> aim to reduce the negative effects of conventional radiation therapy.

### Age at Diagnosis

Young age at diagnosis (less than 3 or 5 years) is one of the classification criteria for high-risk medulloblastoma and one of the most regularly observed risk factors for neurocognitive deficits and IQ decline, especially in case of cranial radiation therapy.<sup>8,80,84,86,93,94,111,124</sup> According to one report, following conventional craniospinal irradiation (35 to 40 Gy), an immediate loss of intellectual performance is observed in younger patients, whereas older patients demonstrate a delay prior to decline in performance.<sup>93</sup> There is less evidence regarding the association between young age at diagnosis and reported social adjustment and quality of life.<sup>39,116</sup>

### Role and Topography of Cerebellar Injury

There is much evidence that cerebellar lesions can cause cognitive dysfunctions (eg,<sup>125-127</sup>), such as working memory deficits,<sup>128</sup> and the "cerebellar cognitive affective syndrome" described in adults<sup>77</sup> has also been reported in children after resection of cerebellar tumors.<sup>78</sup> Different neuropsychological deficits have been described according to the laterality of the cerebellar lesion: language processing deficits have been associated with right cerebellar tumors; spatial and visual deficits have been reported with left cerebellar tumors; and cerebellar mutism syndrome and/or behavioral disturbances have been described with vermian lesions.<sup>129</sup> However, these specific profiles were described in a small sample of patients with posterior fossa tumors, without long-term follow-up. Psychological and behavior problems were not a significant concern in patients treated for medulloblastoma,<sup>124</sup> a tumor which generally involves the vermis. On the other hand, cognitive deficits have been described in children following surgery (without radiotherapy and chemotherapy) for benign cerebellar tumors<sup>81</sup> and there is evidence

that lesions of the cerebellar nuclei are strongly associated with more severe cognitive and motor deficits,<sup>46,49</sup> as well as with the occurrence of a cerebellar mutism syndrome.

### Cerebellar Mutism Syndrome

One frequent complication of surgery is cerebellar mutism syndrome, also known as posterior fossa syndrome. It affects approximately 25% of patients after surgery.<sup>92,130–133</sup> The occurrence of cerebellar mutism syndrome has been associated with disruption of the cerebellocerebral connections.<sup>133–135</sup> Left-handedness and disruption of the connection between the right cerebellum and the left frontal cortex have also been reported as risk factors for the occurrence of postsurgical cerebellar mutism syndrome.<sup>135</sup> The presence of cerebellar mutism syndrome was associated with increased risk of persistent ataxia and cerebellar dysfunction signs,<sup>105,130</sup> speech disturbances,<sup>92,136,137</sup> lower IQ,<sup>84,95</sup> lower academic performances,<sup>84,132</sup> and lower processing speed, attention, and executive functions<sup>132</sup> in the long term.

### Hydrocephalus

Preoperative hydrocephalus was associated with lower verbal IQ in one report,<sup>48</sup> and hydrocephalus requiring permanent shunting has been reported to be associated with lower IQ,<sup>138</sup> lower academic abilities,<sup>124,138</sup> and more reported difficulties in neurocognitive functions,<sup>59</sup> social adjustment,<sup>39</sup> and quality of life.<sup>112</sup>

### Adverse Perioperative Medical Events and Postsurgical Complications

Perioperative and postsurgical complications (eg, infections, hemorrhagic complications, repeat surgery) can lead to poor neurological, intellectual, and social outcomes.<sup>87,95,139,140</sup>

### Hearing Loss

Hearing loss could be a significant risk factor for decline in intellectual and academic skills,<sup>84</sup> as well as a risk factor for poor social outcome.<sup>2</sup>

### Gender

Female gender was reported as a risk factor for verbal IQ decline in children treated for medulloblastoma,<sup>96</sup> for self-reported neurocognitive impairment among survivors of CNS malignancies,<sup>59</sup> for poor educational outcome among survivors of childhood cancer<sup>9–11</sup> and survivors of pediatric brain tumors,<sup>107</sup> as well as for lower HRQoL in survivors of pediatric medulloblastoma.<sup>37</sup> Despite these reports, there is no clear explanation of this often-cited disadvantage of female gender in cognition and academic achievement after childhood cancer or brain tumor.

### Family and Environmental Factors

Previous investigations of QoS following diagnosis of pediatric medulloblastoma have occasionally taken into account family and environmental factors. A few studies have reported that the parents' educational level and marital status were significantly associated with IQ, broad attention, or working memory baseline scores, but not with change over time.<sup>86,93</sup> Socioeconomic status and family functioning were also reported as factors associated with social adjustment or quality of life.<sup>5,39</sup>

## Concluding Remarks and Future Directions

Determinants of poor QoS after childhood medulloblastoma are relatively clear for medical problems, neurocognitive outcomes, and situation-based social difficulties (academic underachievement, unemployment, absence of marital or parental status, absence of independence, etc.). Young age at diagnosis and treatment, conventional radiotherapy, perioperative adverse medical events, tumor and surgery-induced cerebello-cerebral disconnection probably leading to postsurgical cerebellar mutism syndrome and neurological abnormalities, and hearing loss are the main factors compromising these aspects of QoS.

The results are more conflicting for risk factors for poor self-reported and proxy-reported (ie, questionnaire-based) social adjustment and quality of life, with a frequent lack of concordance between questionnaire results and performance-based or patient situation-based assessments. This lack of concordance simply confirms the clinical observation that patients and/or proxies completing questionnaires may minimize or deny considerable difficulties or, on the contrary, maximize minor difficulties or express worries about problems that are not actually present. It is important to take discrepancies of this sort into account for rehabilitation interventions requiring close collaboration of the patient and the proxies, and assessments should include both performance-based assessments and questionnaires.

Interventions aiming to improve neurocognitive outcomes require an understanding of the nature of the almost systematically reported intellectual decline after treatment of childhood medulloblastoma. Logically, decline in performance can be steeper when the baseline performance is high compared to when it is low, and, in case of progressive decline, time since completion of treatment correlates negatively with final performance. Descriptions of decline in terms of "x points per year" should be interpreted with caution, as the effect of time is not linear. Furthermore, initial performances should be taken into account when interpreting the consequences of the decline: when initial performances are different, but slopes are identical, as it has been reported for parental educational level for instance,<sup>86,93</sup> declines in percentages are different (eg, a 10-point difference is an 8% decline if the initial score is 120, but a 14% decline if it is 70).

Slow processing speed and working memory and attention deficits are considered to be the "core" cognitive deficits in children treated for medulloblastoma, explaining

the IQ decline and academic underachievement; however, this is without clear reference to the cerebellar damage itself.<sup>85</sup> It is important to note that the same core deficits are expected after cerebellar lesions, given the role of the cerebellum in working memory<sup>128</sup> and, more generally, in automatic processing.<sup>141,142</sup> A difficulty establishing motor and cognitive automatisms could lead to slower processing and excessive demands placed on attention. Thus, if attention difficulties are related to the absence of automation due to cerebellar dysfunction, they could probably be interpreted as an increased attentional demand.

Manual skill impairments and oculomotor or articulatory deficits, clearly cerebellum-dependent, are strongly associated with cognitive deficits in children treated for medulloblastoma. As already suggested by some authors who have criticized the “cerebellar cognitive affective syndrome” (eg,<sup>143</sup>), it may be difficult to propose a clear distinction between the motor and cognitive functions of the cerebellum, if one considers, for instance, the articulatory movements involved in the subvocal rehearsal of verbal working memory, or the oculomotor movements implicated in spatial and visual sequential memory. Neurological and sensory abnormalities detected in careful clinical examination after the end of treatments for childhood medulloblastoma should be considered as a major risk factor for subsequent cognitive difficulties.

The respective roles of radiotherapy-induced white matter abnormalities on the one hand, and of cerebellar injury, on the other, in cognitive impairment remain unclear. Widespread alterations in white matter microstructure have recently been reported in adults following resection (without radiotherapy) of pediatric low-grade cerebellar tumors.<sup>81</sup> Future studies should focus on specific cognitive deficits and changes in brain structure after resection of childhood benign cerebellar tumors, after posterior fossa irradiation alone, or after supratentorial irradiation alone. It is important to determine whether one or several core cognitive deficits (eg, processing speed, attention) explain the intellectual decline and have a negative impact on different cognitive domains; similarly, it is also essential to gain better understanding of the relationship between core cognitive deficits and the cerebellar lesion.

After childhood medulloblastoma, the presence or not of a “cerebellar cognitive affective syndrome”<sup>77,78</sup> remains unclear, especially its “affective” component. The assessment of affective and emotional difficulties needs to take into account the period in which the evaluation takes place (perioperative vs. long-term follow-up). It seems particularly important to clarify the role of vermian injuries and cerebellocerebral disconnections on behavior. For instance, on the one hand, some reports have described the behavior of children with cerebellar mutism syndrome as autism,<sup>105</sup> and disconnection between the right cerebellum and the supratentorial language areas has been reported in children with autism spectrum disorders.<sup>144</sup> On the other hand, psychological and behavioral problems are frequently reported to be not significant following medulloblastoma diagnosis.<sup>124</sup>

Despite the large corpus of medulloblastoma studies, some implications of the disease and its treatments remain understudied and are characterized by inconclusive or disputed evidence. Past research has been mainly conducted

in small, heterogeneous samples and has focused on specific physiopathological entities of medulloblastoma (unicentric), as opposed to a multicentric approach, thus hindering any comparative methodology across the diversity of medulloblastoma consequences. These limitations have led researchers to recognize the importance of developing randomized controlled trials with large sample sizes, which adopt a multicentric and comparative methodology, and include comprehensive information regarding several dimensions of survivor functioning, based on direct assessments of patients and on indirect measures using patient and proxy (eg, parents, teachers) reports. Recent efforts have been developed among European countries in order to establish a consensus regarding the assessments to be performed when evaluating QoS.<sup>115,145,146</sup> Although these studies entail challenging organization and cooperation among different countries, they have the potential to ensure the formation of large, comparable samples from which multidomain and multi-informant data can be derived.

Future studies should investigate the associations between recent advances in molecular neuro-oncology and QoS after childhood medulloblastoma. They should also aim to uncover the nature of certain relationships, such as that between female gender and lower cognitive and academic achievement after childhood cancer or brain tumor. Likewise, the role of environmental factors, in particular family factors, on cognitive and psychosocial outcomes, which have been shown to be important in other acquired brain pathologies, such as traumatic brain injury, remains underexplored in childhood brain tumors. This is illustrated by reports on children showing positive QoS despite the presence of numerous risk factors for poor outcomes.

## Funding

None declared.

## Acknowledgements

We thank Mrs Swaine Verdier for her careful reading and correction of the text.

**Conflict of interest statement.** None declared.

## References

1. Stiller CA, Kroll ME, Pritchard-Jones K. Population survival from childhood cancer in Britain during 1978–2005 by eras of entry to clinical trials. *Ann Oncol*. 2012;23(9):2464–2469.



2. Gurney JG, Krull KR, Kadan-Lottick N, et al. Social Outcomes in the Childhood Cancer Survivor Study Cohort. *J Clin Oncol*. 2009;27(14):2390–2395.
3. Hudson MM, Oeffinger KC, Jones K, et al. Age-dependent changes in health status in the Childhood Cancer Survivor cohort. *J Clin Oncol*. 2015;33(5):479–491.
4. Oeffinger KC, Mertens AC, Sklar CA, et al. Chronic health conditions in adult survivors of childhood cancer. *N Engl J Med*. 2006;355(15):1572–1582.
5. Maunsell E, Pogany L, Barrera M, Shaw AK, Speechley KN. Quality of Life Among Long-Term Adolescent and Adult Survivors of Childhood Cancer. *J Clin Oncol*. 2006;24(16):2527–2535.
6. Armstrong GT, Liu Q, Yasui Y, et al. Long-Term Outcomes Among Adult Survivors of Childhood Central Nervous System Malignancies in the Childhood Cancer Survivor Study. *J Natl Cancer Inst*. 2009;101(13):946–958.
7. Boman KK, Hovén E, Anclair M, Lannering B, Gustafsson G. Health and persistent functional late effects in adult survivors of childhood CNS tumours: A population-based cohort study. *Eur J Cancer*. 2009;45(14):2552–2561.
8. Mitby PA, Robison LL, Whitton JA, et al. Utilization of special education services and educational attainment among long-term survivors of childhood cancer: a report from the Childhood Cancer Survivor Study. *Cancer*. 2003;97(4):1115–1126.
9. Lancashire ER, Frobisher C, Reulen RC, Winter DL, Glaser A, Hawkins MM. Educational Attainment Among Adult Survivors of Childhood Cancer in Great Britain: A Population-Based Cohort Study. *J Natl Cancer Inst*. 2010;102(4):254–270.
10. Koch SV, Kejs AMT, Engholm G, Johansen C, Schmiegelow K. Educational attainment among survivors of childhood cancer: a population-based cohort study in Denmark. *Br J Cancer*. 2004;91(5):923–928.
11. Lorenzi M, McMillan AJ, Siegel LS, et al. Educational outcomes among survivors of childhood cancer in British Columbia, Canada: Report of the Childhood/Adolescent/Young Adult Cancer Survivors (CAYACS) Program. *Cancer*. 2009;115(10):2234–2245.
12. de Boer AGEM, Verbeek JHAM, van Dijk FJH. Adult survivors of childhood cancer and unemployment: A metaanalysis. *Cancer*. 2006;107(1):1–11.
13. Peris-Bonet R, Martínez-García C, Lacour B, et al. Childhood central nervous system tumours – incidence and survival in Europe (1978–1997): Report from Automated Childhood Cancer Information System project. *Eur J Cancer*. 2006;42(13):2064–2080.
14. Bartlett F, Kortmann R, Saran F. Medulloblastoma. *Clin Oncol*. 2013;25(1):36–45.
15. Brandes AA, Paris MK. Review of the prognostic factors in medulloblastoma of children and adults. *Crit Rev Oncol Hematol*. 2004;50(2):121–128.
16. Weller M, Pfister SM, Wick W, Hegi ME, Reifenberger G, Stupp R. Molecular neuro-oncology in clinical practice: a new horizon. *Lancet Oncol*. 2013;14(9):e370–379.
17. Gajjar A, Pfister SM, Taylor MD, Gilbertson RJ. Molecular Insights into Pediatric Brain Tumors Have the Potential to Transform Therapy. *Clin Cancer Res*. 2014;20(22):5630–5640.
18. Zhukova N, Ramaswamy V, Remke M, et al. Subgroup-Specific Prognostic Implications of TP53 Mutation in Medulloblastoma. *J Clin Oncol*. 2013;31(23):2927–2935.
19. Gajjar A, Bowers DC, Karajannis MA, Leary S, Witt H, Gottardo NG. Pediatric Brain Tumors: Innovative Genomic Information Is Transforming the Diagnostic and Clinical Landscape. *J Clin Oncol*. 2015;33(27):2986–2998.
20. Thompson EM, Hielscher T, Bouffet E, et al. Prognostic value of medulloblastoma extent of resection after accounting for molecular subgroup: a retrospective integrated clinical and molecular analysis. *Lancet Oncol*. 2016;S1470–2045.
21. Merchant TE, Kun LE, Krasin MJ, et al. Multi-Institution Prospective Trial of Reduced-Dose Craniospinal Irradiation (23.4 Gy) Followed by Conformal Posterior Fossa (36 Gy) and Primary Site Irradiation (55.8 Gy) and Dose-Intensive Chemotherapy for Average-Risk Medulloblastoma. *Int J Radiat Oncol*. 2008;70(3):782–787.
22. Grill J, Renaux VK, Bulteau C, et al. Long-term intellectual outcome in children with posterior fossa tumors according to radiation doses and volumes. *Int J Radiat Oncol*. 1999;45(1):137–145.
23. Rutkowski S, Bode U, Deinlein F, et al. Treatment of early childhood medulloblastoma by postoperative chemotherapy alone. *N Engl J Med*. 2005;352(10):978–986.
24. Rutkowski S, Gerber NU, von Hoff K, et al. Treatment of early childhood medulloblastoma by postoperative chemotherapy and deferred radiotherapy. *Neuro Oncol*. 2008;11(2):201–210.
25. Lannering B, Rutkowski S, Doz F, et al. Hyperfractionated Versus Conventional Radiotherapy Followed by Chemotherapy in Standard-Risk Medulloblastoma: Results From the Randomized Multicenter HIT-SIOP PNET 4 Trial. *J Clin Oncol*. 2012;30(26):3187–3193.
26. Packer RJ, Zhou T, Holmes E, Vezina G, Gajjar A. Survival and secondary tumors in children with medulloblastoma receiving radiotherapy and adjuvant chemotherapy: results of Children's Oncology Group trial A9961. *Neuro Oncol*. 2013;15(1):97–103.
27. Brodin NP, Vogelius IR, Björk-Eriksson T, Munck af Rosenschöld P, Bentzen SM. Modeling Freedom From Progression for Standard-Risk Medulloblastoma: A Mathematical Tumor Control Model With Multiple Modes of Failure. *Int J Radiat Oncol*. 2013;87(2):422–429.
28. Packer RJ, Gajjar A, Vezina G, et al. Phase III Study of Craniospinal Radiation Therapy Followed by Adjuvant Chemotherapy for Newly Diagnosed Average-Risk Medulloblastoma. *J Clin Oncol*. 2006;24(25):4202–4208.
29. Walter AW, Mulhern RK, Gajjar A, et al. Survival and neurodevelopmental outcome of young children with medulloblastoma at St Jude Children's Research Hospital. *J Clin Oncol*. 1999;17(12):3720–3728.
30. Johnston DL, Keene D, Bartels U, et al. Medulloblastoma in children under the age of three years: a retrospective Canadian review. *J Neurooncol*. 2009;94(1):51–56.
31. Mathew RK, O'Kane R, Parslow R, et al. Comparison of survival between the UK and US after surgery for most common pediatric CNS tumors. *Neuro Oncol*. 2014;16(8):1137–1145.
32. Sirachainan N, Nuchprayoon I, Thanarattanakorn P, et al. Outcome of medulloblastoma in children treated with reduced-dose radiation therapy plus adjuvant chemotherapy. *J Clin Neurosci*. 2011;18(4):515–519.
33. Frange P, Alapetite C, Gaboriaud G, et al. From childhood to adulthood: long-term outcome of medulloblastoma patients. The Institut Curie experience (1980–2000). *J Neurooncol*. 2009;95(2):271–279.
34. Edelstein K, Spiegler BJ, Fung S, et al. Early aging in adult survivors of childhood medulloblastoma: long-term neurocognitive, functional, and physical outcomes. *Neuro Oncol*. 2011;13(5):536–545.
35. Ribi K, Rely C, Landolt MA, Alber FD, Boltshauser E, Grotzer MA. Outcome of medulloblastoma in children: long-term complications and quality of life. *Neuropediatrics*. 2005;36(6):357–365.
36. Johnson DL, McCabe MA, Nicholson HS, et al. Quality of long-term survival in young children with medulloblastoma. *J Neurosurg*. 1994;80(6):1004–1010.
37. Kennedy C, Bull K, Chevignard M, et al. Quality of Survival and Growth in Children and Young Adults in the PNET4 European Controlled Trial of Hyperfractionated Versus Conventional Radiation Therapy for Standard-Risk Medulloblastoma. *Int J Radiat Oncol*. 2014;88(2):292–300.
38. Bhat SR, Goodwin TL, Burwinkle TM, et al. Profile of Daily Life in Children With Brain Tumors: An Assessment of Health-Related Quality of Life. *J Clin Oncol*. 2005;23(24):5493–5500.



39. Schulte F, Barrera M. Social competence in childhood brain tumor survivors: a comprehensive review. *Support Care Cancer*. 2010;18(12):1499–1513.
40. Brinkman TM, Palmer SL, Chen S, et al. Parent-Reported Social Outcomes After Treatment for Pediatric Embryonal Tumors: A Prospective Longitudinal Study. *J Clin Oncol*. 2012;30(33):4134–4140.
41. Kiltie AE, Lashford LS, Gattamaneni HR. Survival and late effects in medulloblastoma patients treated with craniospinal irradiation under three years old. *Med Pediatr Oncol*. 1997;28(5):348–354.
42. Benesch M, Spiegl K, Winter A, et al. A scoring system to quantify late effects in children after treatment for medulloblastoma/ependymoma and its correlation with quality of life and neurocognitive functioning. *Childs Nerv Syst*. 2009;25(2):173–181.
43. Rueckriegel SM, Blankenburg F, Henze G, Baqué H, Driever PH. Loss of fine motor function correlates with ataxia and decline of cognition in cerebellar tumor survivors. *Pediatr Blood Cancer*. 2009;53(3):424–431.
44. Piscione PJ, Bouffet E, Mabbott DJ, Shams I, Kulkarni AV. Physical functioning in pediatric survivors of childhood posterior fossa brain tumors. *Neuro Oncol*. 2014;16(1):147–155.
45. Schoch B, Konczak J, Dimitrova A, Gizewski E, Wieland R, Timmann D. Impact of Surgery and Adjuvant Therapy on Balance Function in Children and Adolescents with Cerebellar Tumors. *Neuropediatrics*. 2006;37(6):350–358.
46. Callu D, Viguier D, Laroussinie F, et al. Cognitive and Academic Outcome After Benign or Malignant Cerebellar Tumor in Children: *Cogn Behav Neurol*. 2009;22(4):270–278.
47. Ullrich NJ, Pomeroy SL, Kapur K, Manley PE, Goumnerova LC, Loddenkemper T. Incidence, risk factors, and longitudinal outcome of seizures in long-term survivors of pediatric brain tumors. *Epilepsia*. 2015;56(10):1599–1604.
48. Grill J, Viguier D, Kieffer V, et al. Critical risk factors for intellectual impairment in children with posterior fossa tumors: the role of cerebellar damage. *J Neurosurg*. 2004;101(2 Suppl):152–158.
49. Puget S, Boddaert N, Viguier D, et al. Injuries to inferior vermis and dentate nuclei predict poor neurological and neuropsychological outcome in children with malignant posterior fossa tumors. *Cancer*. 2009;115(6):1338–1347.
50. Davis EE, Pitchford NJ, Jaspan T, McArthur D, Walker D. Development of cognitive and motor function following cerebellar tumour injury sustained in early childhood. *Cortex*. 2010;46(7):919–932.
51. Walker DA, Pillow J, Waters KD, Keir E. Enhanced cis-platinum ototoxicity in children with brain tumours who have received simultaneous or prior cranial irradiation. *Med Pediatr Oncol*. 1989;17(1):48–52.
52. Lafay-Cousin L, Purdy E, Huang A, et al. Early cisplatin induced ototoxicity profile may predict the need for hearing support in children with medulloblastoma: Cisplatin Related Ototoxicity in Medulloblastoma. *Pediatr Blood Cancer*. 2013;60(2):287–292.
53. Schell MJ, McHaney VA, Green AA, et al. Hearing loss in children and young adults receiving cisplatin with or without prior cranial irradiation. *J Clin Oncol*. 1989;7(6):754–760.
54. Paulino AC, Lobo M, Teh BS, et al. Ototoxicity After Intensity-Modulated Radiation Therapy and Cisplatin-Based Chemotherapy in Children With Medulloblastoma. *Int J Radiat Oncol*. 2010;78(5):1445–1450.
55. Huang E, Teh BS, Strother DR, et al. Intensity-modulated radiation therapy for pediatric medulloblastoma: early report on the reduction of ototoxicity. *Int J Radiat Oncol*. 2002;52(3):599–605.
56. Yock TI, Yeap BY, Ebb DH, et al. Long-term toxic effects of proton radiotherapy for paediatric medulloblastoma: a phase 2 single-arm study. *Lancet Oncol*. 2016;17(3):287–298.
57. Notteghem P, Soler C, Dellatolas G, et al. Neuropsychological outcome in long-term survivors of a childhood extracranial solid tumor who have undergone autologous bone marrow transplantation. *Bone Marrow Transplant*. 2003;31(7):599–606.
58. Orgel E, O'Neil SH, Kayser K, et al. Effect of Sensorineural Hearing Loss on Neurocognitive Functioning in Pediatric Brain Tumor Survivors: Hearing Loss-Associated Neurocognitive Outcomes. *Pediatr Blood Cancer*. 2016;63(3):527–534.
59. Ellenberg L, Liu Q, Gioia G, et al. Neurocognitive status in long-term survivors of childhood CNS malignancies: A report from the Childhood Cancer Survivor Study. *Neuropsychology*. 2009;23(6):705–717.
60. Moeller BJ, Chintagumpala M, Philip JJ, et al. Low early ototoxicity rates for pediatric medulloblastoma patients treated with proton radiotherapy. *Radiat Oncol*. 2011;6:58.
61. Pulsifer MB, Sethi RV, Kuhlthau KA, MacDonald SM, Tarbell NJ, Yock TI. Early Cognitive Outcomes Following Proton Radiation in Pediatric Patients With Brain and Central Nervous System Tumors. *Int J Radiat Oncol Biol Phys*. 2015;93(2):400–407.
62. Heikens J, Michiels EM, Behrendt H, Endert E, Bakker PJ, Fliers E. Long-term neuro-endocrine sequelae after treatment for childhood medulloblastoma. *Eur J Cancer*. 1998;34(10):1592–1597.
63. Laughton SJ, Merchant TE, Sklar CA, et al. Endocrine Outcomes for Children With Embryonal Brain Tumors After Risk-Adapted Craniospinal and Conformal Primary-Site Irradiation and High-Dose Chemotherapy With Stem-Cell Rescue on the SJMB-96 Trial. *J Clin Oncol*. 2008;26(7):1112–1118.
64. Livesey E, Hindmarsh P, Brook C, et al. Endocrine disorders following treatment of childhood brain tumours. *Br J Cancer*. 1990;61(4):622–625.
65. Olshan JS, Gubernick J, Packer RJ, et al. The effects of adjuvant chemotherapy on growth in children with medulloblastoma. *Cancer*. 1992;70(7):2013–2017.
66. Vázquez E, Castellote A, Piqueras J, et al. Second Malignancies in Pediatric Patients: Imaging Findings and Differential Diagnosis1. *RadioGraphics*. 2003;23(5):1155–1172.
67. Cassidy L, Stirling R, May K, Picton S, Doran R. Ophthalmic complications of childhood medulloblastoma. *Med Pediatr Oncol*. 2000;34(1):43–47.
68. Packer RJ, Gurney JG, Punyko JA, et al. Long-Term Neurologic and Neurosensory Sequelae in Adult Survivors of a Childhood Brain Tumor: Childhood Cancer Survivor Study. *J Clin Oncol*. 2003;21(17):3255–3261.
69. Adeleye AO, Balogun JA. Bilateral deafness and blindness from a IVth ventricular medulloblastoma. *Br J Neurosurg*. 2009;23(3):315–317.
70. Wolfe KR, Hunter GR, Madan-Swain A, Reddy AT, Baños J, Kana RK. Cardiorespiratory Fitness in Survivors of Pediatric Posterior Fossa Tumor. *J Pediatr Hematol Oncol*. 2012;34(6):e222–e227.
71. Odame I, Duckworth J, Talsma D, et al. Osteopenia, physical activity and health-related quality of life in survivors of brain tumors treated in childhood. *Pediatr Blood Cancer*. 2006;46(3):357–362.
72. Mulhern RK, Reddick WE, Palmer SL, et al. Neurocognitive deficits in medulloblastoma survivors and white matter loss. *Ann Neurol*. 1999;46(6):834–841.
73. Mulhern RK, Palmer SL, Reddick WE, et al. Risks of young age for selected neurocognitive deficits in medulloblastoma are associated with white matter loss. *J Clin Oncol*. 2001;19(2):472–479.
74. Mabbott DJ, Noseworthy M, Bouffet E, Rockel C, Laughlin S. Diffusion tensor imaging of white matter after cranial radiation in children for medulloblastoma: Correlation with IQ. *Neuro Oncol*. 2006;8(3):244–252.
75. Brinkman TM, Reddick WE, Luxton J, et al. Cerebral white matter integrity and executive function in adult survivors of childhood medulloblastoma. *Neuro Oncol*. 2012;14(Suppl 4):iv25–iv36.
76. Reddick WE, White HA, Glass JO, et al. Developmental model relating white matter volume to neurocognitive deficits in pediatric brain tumor survivors. *Cancer*. 2003;97(10):2512–2519.

77. Schmähmann J, Sherman JC. The cerebellar cognitive affective syndrome. *Brain*. 1998;121(Pt 4):561–579.
78. Levisohn L, Cronin-Golomb A, Schmähmann J. Neuropsychological consequences of cerebellar tumour resection in children: Cerebellar cognitive affective syndrome in a paediatric population. *Brain*. 2000;123(Pt 5):1041–1050.
79. Rønning C, Sundet K, Due-Tønnessen B, Lundar T, Helseth E. Persistent Cognitive Dysfunction Secondary to Cerebellar Injury in Patients Treated for Posterior Fossa Tumors in Childhood. *Pediatr Neurosurg*. 2005;41(1):15–21.
80. Vaquero E, Gómez CM, Quintero EA, González-Rosa JJ, Márquez J. Differential prefrontal-like deficit in children after cerebellar astrocytoma and medulloblastoma tumor. *Behav Brain Funct*. 2008;4:18.
81. Moberget T, Andersson S, Lundar T, et al. Long-term supratentorial brain structure and cognitive function following cerebellar tumour resections in childhood. *Neuropsychologia*. 2015;69:218–231.
82. Spiegler BJ, Bouffet E, Greenberg ML, Rutka JT, Mabbott DJ. Change in Neurocognitive Functioning After Treatment With Cranial Radiation in Childhood. *J Clin Oncol*. 2004;22(4):706–713.
83. Ris MD, Walsh K, Wallace D, et al. Intellectual and academic outcome following two chemotherapy regimens and radiotherapy for average-risk medulloblastoma: COG A9961: Neurocognitive Outcome in Medulloblastoma. *Pediatr Blood Cancer*. 2013;60(8):1350–1357.
84. Schreiber JE, Gurney JG, Palmer SL, et al. Examination of risk factors for intellectual and academic outcomes following treatment for pediatric medulloblastoma. *Neuro Oncol*. 2014;16(8):1129–1136.
85. Palmer SL. Neurodevelopmental impact on children treated for medulloblastoma: A review and proposed conceptual model. *Dev Disabil Res Rev*. 2008;14(3):203–210.
86. Palmer SL, Armstrong C, Onar-Thomas A, et al. Processing Speed, Attention, and Working Memory After Treatment for Medulloblastoma: An International, Prospective, and Longitudinal Study. *J Clin Oncol*. 2013;31(28):3494–3500.
87. Mabbott DJ, Penkman L, Witol A, Strother D, Bouffet E. Core neurocognitive functions in children treated for posterior fossa tumors. *Neuropsychology*. 2008;22(2):159–168.
88. Reeves CB, Palmer SL, Reddick WE, et al. Attention and Memory Functioning Among Pediatric Patients with Medulloblastoma. *J Pediatr Psychol*. 2005;31(3):272–280.
89. Mabbott DJ, Snyder JJ, Penkman L, Witol A. The effects of treatment for posterior fossa brain tumors on selective attention. *J Int Neuropsychol Soc*. 2009;15(2):205–216.
90. Law N, Smith ML, Greenberg M, et al. Executive function in paediatric medulloblastoma: The role of cerebrocerebellar connections. *J Neuropsychol*. 2015.
91. Wolfe KR, Madan-Swain A, Kana RK. Executive Dysfunction in Pediatric Posterior Fossa Tumor Survivors: A Systematic Literature Review of Neurocognitive Deficits and Interventions. *Dev Neuropsychol*. 2012;37(2):153–175.
92. De Smet HJ, Baillieux H, Catsman-Berrevoets C, De Deyn PP, Mariën P, Paquier PF. Postoperative motor speech production in children with the syndrome of “cerebellar” mutism and subsequent dysarthria: A critical review of the literature. *Eur J Paediatr Neurol*. 2007;11(4):193–207.
93. Palmer SL, Gajjar A, Reddick WE, et al. Predicting Intellectual Outcome Among Children Treated With 35–40 Gy Craniospinal Irradiation for Medulloblastoma. *Neuropsychology*. 2003;17(4):548–555.
94. Mulhern RK, Kepner JL, Thomas PR, Armstrong FD, Friedman HS, Kun LE. Neuropsychologic functioning of survivors of childhood medulloblastoma randomized to receive conventional or reduced-dose craniospinal irradiation: a Pediatric Oncology Group study. *J Clin Oncol*. 1998;16(5):1723–1728.
95. Moxon-Emre I, Bouffet E, Taylor MD, et al. Impact of Craniospinal Dose, Boost Volume, and Neurologic Complications on Intellectual Outcome in Patients With Medulloblastoma. *J Clin Oncol*. 2014;32(17):1760–1768.
96. Ris MD, Packer R, Goldwein J, Jones-Wallace D, Boyett JM. Intellectual outcome after reduced-dose radiation therapy plus adjuvant chemotherapy for medulloblastoma: a Children's Cancer Group study. *J Clin Oncol*. 2001;19(15):3470–3476.
97. Kieffer-Renaux V, Viguier D, Raquin M-A, et al. Therapeutic schedules influence the pattern of intellectual decline after irradiation of posterior fossa tumors. *Pediatr Blood Cancer*. 2005;45(6):814–819.
98. Hoppe-Hirsch E, Brunet L, Laroussinie F, et al. Intellectual outcome in children with malignant tumors of the posterior fossa: influence of the field of irradiation and quality of surgery. *Childs Nerv Syst*. 1995;11(6):340–345.
99. Palmer SL, Goloubeva O, Reddick WE, et al. Patterns of intellectual development among survivors of pediatric medulloblastoma: a longitudinal analysis. *J Clin Oncol*. 2001;19(8):2302–2308.
100. Maddrey AM, Bergeron JA, Lombardo ER, et al. Neuropsychological performance and quality of life of 10 year survivors of childhood medulloblastoma. *J Neurooncol*. 2005;72(3):245–253.
101. Chevignard MP, Soo C, Galvin J, Catroppa C, Eren S. Ecological assessment of cognitive functions in children with acquired brain injury: A systematic review. *Brain Inj*. 2012;26(9):1033–1057.
102. Anderson P, Northam E, Jacobs R, Mikiewicz O, Anderson VA. Relationships Between Cognitive and Behavioral Measures of Executive Function in Children With Brain Disease. *Child Neuropsychol*. 2002;8(4):231–240.
103. Coutinho V, Câmara-Costa H, Kemlin I, Billette de Villemeur T, Rodriguez D, Dellatolas G. The discrepancy between performance-based measures and questionnaires when assessing clinical outcomes and quality of life in patients with neurological disorders. *Appl Neuropsychol Child*. (in press).
104. Huber JF, Bradley K, Spiegler B, Dennis M. Long-Term Neuromotor Speech Deficits in Survivors of Childhood Posterior Fossa Tumors: Effects of Tumor Type, Radiation, Age at Diagnosis, and Survival Years. *J Child Neurol*. 2007;22(7):848–854.
105. Catsman-Berrevoets CE, Aarsen FK. The spectrum of neurobehavioural deficits in the Posterior Fossa Syndrome in children after cerebellar tumour surgery. *Cortex*. 2010;46(7):933–946.
106. Hopyan T, Laughlin S, Dennis M. Emotions and Their Cognitive Control in Children With Cerebellar Tumors. *J Int Neuropsychol Soc*. 2010;16(6):1027–1038.
107. Lähteenmäki PM, Harila-Saari A, Pukkala EI, Kyyrönen P, Salmi TT, Sankila R. Scholastic achievements of children with brain tumors at the end of comprehensive education: a nationwide, register-based study. *Neurology*. 2007;69(3):296–305.
108. Bonner MJ, Hardy KK, Willard VW, Anthony KK, Hood M, Gururangan S. Social Functioning and Facial Expression Recognition in Survivors of Pediatric Brain Tumors. *J Pediatr Psychol*. 2008;33(10):1142–1152.
109. Fuemmeler BF, Elkin TD, Mullins LL. Survivors of childhood brain tumors: behavioral, emotional, and social adjustment. *Clin Psychol Rev*. 2002;22(4):547–585.
110. Henrich N, Marra CA, Gastonguay L, et al. De-escalation of therapy for pediatric medulloblastoma: Trade-offs between quality of life and survival: Treatment Preferences for Medulloblastoma. *Pediatr Blood Cancer*. 2014;61(7):1300–1304.
111. Lannering B, Marky I, Lundberg A, Olsson E. Long-term sequelae after pediatric brain tumors: Their effect on disability and quality of life. *Med Pediatr Oncol*. 1990;18(4):304–310.
112. Kulkarni AV, Piscione J, Shams I, Bouffet E. Long-term quality of life in children treated for posterior fossa brain tumors: Clinical article. *J Neurosurg Pediatr*. 2013;12(3):235–240.

113. Lebaron S, Zeltzer PM, Zeltzer LK, Scott SE, Marlin AE. Assessment of quality of survival in children with medulloblastoma and cerebellar astrocytoma. *Cancer*. 1988;62(6):1215–1222.
114. Kuhlthau KA, Pulsifer MB, Yeap BY, et al. Prospective Study of Health-Related Quality of Life for Children With Brain Tumors Treated With Proton Radiotherapy. *J Clin Oncol*. 2012;30(17):2079–2086.
115. Bull KS, Liossi C, Peacock JL, Yuen HM, Kennedy CR. Screening for cognitive deficits in 8 to 14-year old children with cerebellar tumors using self-report measures of executive and behavioral functioning and health-related quality of life. *Neuro Oncol*. 2015;17(12):1628–1636.
116. Bull KS, Liossi C, Culliford D, Peacock JL, Kennedy CR, Children's Cancer and Leukaemia Group (CCLG). Child-related characteristics predicting subsequent health-related quality of life in 8- to 14-year-old children with and without cerebellar tumors: a prospective longitudinal study. *Neuro Oncol Pract*. 2014;1(3):114–122.
117. Duffner PK, Cohen ME. Long-term consequences of CNS treatment for childhood cancer, part II: Clinical consequences. *Pediatr Neurol*. 1991;7(4):237–242.
118. Copeland DR, deMoor C, Moore BD, Ater JL. Neurocognitive development of children after a cerebellar tumor in infancy: A longitudinal study. *J Clin Oncol*. 1999;17(11):3476–3486.
119. Mulhern RK, Palmer SL, Merchant TE, et al. Neurocognitive Consequences of Risk-Adapted Therapy for Childhood Medulloblastoma. *J Clin Oncol*. 2005;23(24):5511–5519.
120. Kieffer-Renaux V, Bulteau C, Grill J, Kalifa C, Viguier D, Jambaque I. Patterns of neuropsychological deficits in children with medulloblastoma according to craniospinal irradiation doses. *Dev Med Child Neurol*. 2000;42(11):741–745.
121. Silber JH, Radcliffe J, Peckham V, et al. Whole-brain irradiation and decline in intelligence: the influence of dose and age on IQ score. *J Clin Oncol*. 1992;10(9):1390–1396.
122. Lafay-Cousin L, Bouffet E, Hawkins C, Amid A, Huang A, Mabbott D. Impact of radiation avoidance on survival and neurocognitive outcome in infant medulloblastoma. *Curr Oncol*. 2009;16(6):21–28.
123. Gupta T, Jalali R, Goswami S, et al. Early Clinical Outcomes Demonstrate Preserved Cognitive Function in Children With Average-Risk Medulloblastoma When Treated With Hyperfractionated Radiation Therapy. *Int J Radiat Oncol*. 2012;83(5):1534–1540.
124. Mabbott DJ, Spiegler BJ, Greenberg ML, Rutka JT, Hyder DJ, Bouffet E. Serial Evaluation of Academic and Behavioral Outcome After Treatment With Cranial Radiation in Childhood. *J Clin Oncol*. 2005;23(10):2256–2263.
125. Tedesco AM, Chiricozzi FR, Clausi S, Lupo M, Molinari M, Leggio MG. The cerebellar cognitive profile. *Brain*. 2011;134(Pt 12):3672–3686.
126. Timmann D, Drepper J, Frings M, et al. The human cerebellum contributes to motor, emotional and cognitive associative learning. A review. *Cortex*. 2010;46(7):845–857.
127. Ramnani N. Automatic and Controlled Processing in the Corticocerebellar System. *Prog Brain Res*. 2014;210:255–285.
128. Ravizza SM, McCormick CA, Schlerf JE, Justus T, Ivry RB, Fiez JA. Cerebellar damage produces selective deficits in verbal working memory. *Brain*. 2005;129(Pt 2):306–320.
129. Riva D, Giorgi C. The cerebellum contributes to higher functions during development: Evidence from a series of children surgically treated for posterior fossa tumours. *Brain*. 2000;123(Pt 5):1051–1061.
130. Robertson PL, Muraszko KM, Holmes EJ, et al. Incidence and severity of postoperative cerebellar mutism syndrome in children with medulloblastoma: a prospective study by the Children's Oncology Group. *J Neurosurg*. 2006;105(Suppl 6):444–451.
131. Wells EM, Khademan ZP, Walsh KS, et al. Postoperative cerebellar mutism syndrome following treatment of medulloblastoma: neuroradiographic features and origin: Clinical article. *J Neurosurg Pediatr*. 2010;5(4):329–334.
132. Palmer SL, Hassall T, Evankovich K, et al. Neurocognitive outcome 12 months following cerebellar mutism syndrome in pediatric patients with medulloblastoma. *Neuro Oncol*. 2010;12(12):1311–1317.
133. Gelabert-González M, Fernández-Villa J. Mutism after posterior fossa surgery. Review of the literature. *Clin Neurol Neurosurg*. 2001;103(2):111–114.
134. Ozimek A, Richter S, Hein-Kropp C, et al. Cerebellar mutism: Report of four cases. *J Neurol*. 2004;251(8):963–972.
135. Miller NG, Reddick WE, Kocak M, et al. Cerebellocerebral Diaschisis Is the Likely Mechanism of Postsurgical Posterior Fossa Syndrome in Pediatric Patients with Midline Cerebellar Tumors. *Am J Neuroradiol*. 2010;31(2):288–294.
136. Law N, Greenberg M, Bouffet E, et al. Clinical and neuroanatomical predictors of cerebellar mutism syndrome. *Neuro Oncol*. 2012;14(10):1294–1303.
137. De Smet HJ, Catsman-Berrevorts C, Aarsen F, Verhoeven J, Mariën P, Paquier PF. Auditory-perceptual speech analysis in children with cerebellar tumours: A long-term follow-up study. *Eur J Paediatr Neurol*. 2012;16(5):434–442.
138. Hardy KK, Bonner MJ, Willard VW, Watral MA, Gururangan S. Hydrocephalus as a possible additional contributor to cognitive outcome in survivors of pediatric medulloblastoma. *Psychooncology*. 2008;17(11):1157–1161.
139. Roncadin C, Dennis M, Greenberg ML, Spiegler BJ. Adverse medical events associated with childhood cerebellar astrocytomas and medulloblastomas: natural history and relation to very long-term neurobehavioral outcome. *Childs Nerv Syst*. 2008;24(9):995–1002.
140. Kao GD, Goldwein JW, Schultz DJ, Radcliffe J, Sutton L, Lange B. The impact of perioperative factors on subsequent intelligence quotient deficits in children treated for medulloblastoma/posterior fossa primitive neuroectodermal tumors. *Cancer*. 1994;74(3):965–971.
141. Ait Khelifa-Gallois N, Puget S, Longaud A, et al. Clinical Evidence of the Role of the Cerebellum in the Suppression of Overt Articulatory Movements During Reading. A Study of Reading in Children and Adolescents Treated for Cerebellar Pilocytic Astrocytoma. *The Cerebellum*. 2015;14(2):97–105.
142. Balsters JH, Ramnani N. Cerebellar Plasticity and the Automation of First-Order Rules. *J Neurosci*. 2011;31(6):2305–2312.
143. Glickstein M. Thinking about the cerebellum. *Brain*. 2006;129(Pt 2):288–290.
144. Verly M, Verhoeven J, Zink I, et al. Altered functional connectivity of the language network in ASD: Role of classical language areas and cerebellum. *NeuroImage Clin*. 2014;4:374–382.
145. Tallen G, Resch A, Calaminus G, et al. Strategies to improve the quality of survival for childhood brain tumour survivors. *Eur J Paediatr Neurol*. 2015;19(6):619–639.
146. Limond JA, Bull KS, Calaminus G, Kennedy CR, Spoudeas HA, Chevignard MP. Quality of survival assessment in European childhood brain tumour trials, for children aged 5 years and over. *Eur J Paediatr Neurol*. 2015;19(2):202–210.
